# Supplementary material for: Vegans, Vegetarians and Pescatarians Are at Risk of Iodine Deficiency in Norway
Source: PubMed Central journal article supplement (PMC7699510; doi:10.3390/nu12113555), 2020-11-20
Supplement: nutrients-12-03555-s001.pdf [file nutrients-12-03555-s001.pdf]

**Table S1.** Iodine intake from foods, supplements and macroalgae by 24-hour and habitual intake in vegans (*n*=115).

| Vegans                                         | Calculated iodine intake $\mu\text{g/day}$ (Median (IQR)) |                                     |                                     |                                 | P-value <sup>a</sup> |          |
|------------------------------------------------|-----------------------------------------------------------|-------------------------------------|-------------------------------------|---------------------------------|----------------------|----------|
|                                                | 24-hour intake                                            | All ( <i>n</i> =115)                | Non supplement user ( <i>n</i> =58) | Supplement user ( <i>n</i> =57) |                      |          |
| Food only                                      |                                                           | 19 (12, 30)                         | 19 (12, 34)                         | 19 (13, 25)                     |                      |          |
| I Supplements only                             |                                                           | 150 (150, 225)                      | NA                                  | 150 (150, 225)                  |                      |          |
| Total intake                                   |                                                           | 92 (19, 171)                        | 19 (12, 34)                         | 171 (163, 261)                  | <0.001**             |          |
| % (n/N) below the EAR (100 $\mu\text{g/day}$ ) |                                                           | 54% (62/115)                        | 100% (58/58)                        | 7% (4/57)                       |                      |          |
| % (n/N) above the UL (600 $\mu\text{g/day}$ )  |                                                           | 0% (0/115)                          | 0% (0/58)                           | 0% (0/57)                       |                      |          |
| Habitual intake                                | All ( <i>n</i> =115)                                      | Non supplement user ( <i>n</i> =46) | Supplement user ( <i>n</i> =69)     | Macroalgae user ( <i>n</i> =23) |                      |          |
| Food only                                      |                                                           | 16 (11, 21)                         | 15 (11, 19)                         | 17 (11, 22)                     | 13 (11, 24)          |          |
| I Supplements only                             |                                                           | 150 (150, 150)                      | NA                                  | 150 (150, 150)                  | 150 (150, 150)       |          |
| Macro-algae only                               |                                                           | 865 (364, 1978)                     | 1300 (705, 2289) ( <i>n</i> =9)     | 705 (266, 1925) ( <i>n</i> =14) | 865 (364, 1978)      |          |
| Total intake                                   |                                                           | 315 (19, 361)                       | 15 (11, 19)                         | 321 (314, 440)                  | 1011 (639, 1982)     | <0.001** |
| % (n/N) below the EAR (100 $\mu\text{g/day}$ ) |                                                           | 32% (37/115)                        | 80% (37/46)                         | 0% (0/69)                       | 0% (0/23)            |          |
| % (n/N) above the UL (600 $\mu\text{g/day}$ )  |                                                           | 18% (21/115)                        | 17% (8/46)                          | 19% (13/69)                     | 79% (18/23)          |          |

<sup>a</sup> Kruskal Wallis test was used to test difference in total intake between non-supplement users, supplement users and macroalgae users, significant p-values <0.001 are marked as \*\*.

**Table S2.** Iodine intake from foods, supplements and macroalgae by 24-hour and habitual intake in vegetarians (*n*=55).

| Vegetarians                        | Calculated iodine intake<br>µg/day (Median (IQR)) |                                  |                                 | P-value <sup>a</sup>  |
|------------------------------------|---------------------------------------------------|----------------------------------|---------------------------------|-----------------------|
| <b>24-hour intake</b>              | All (n=55)                                        | Non supplement user (n=30)       | Supplement user (n=25)          |                       |
| Food only                          | 17 (12, 30)                                       | 19 (12, 34)                      | 15 (12, 25)                     |                       |
| I Supplements only                 | 150 (150, 150)                                    | NA                               | 150 (150, 150)                  |                       |
| Total intake                       | 70 (17, 165)                                      | 19 (12, 34)                      | 167 (162, 181)                  | <0.001**              |
| % (n/N) below the EAR (100 µg/day) | 51% (28/55)                                       | 93% (28/30)                      | 0% (0/25)                       |                       |
| % (n/N) above the UL (600 µg/day)  | 0% (0/55)                                         | 0% (0/30)                        | 0% (0/25)                       |                       |
| <b>Habitual intake</b>             | All (n=55)                                        | Non supplement user (n=29)       | Supplement user (n=26)          | Macroalgae user (n=8) |
| Food only                          | 16 (11, 23)                                       | 15 (11, 23)                      | 16 (12, 23)                     | 21 (8, 26)            |
| I Supplements only                 | 150 (150, 150)                                    | NA                               | 150 (150, 150)                  | 150 (150, 750)        |
| Macro-algae only                   | 843 (705, 1590)                                   | 1176 (274, 2510)<br><b>(n=4)</b> | 843 (705, 1303)<br><b>(n=4)</b> | 843 (705, 1590)       |
| Total intake                       | 305 (15, 323)                                     | 16 (12, 33)                      | 318 (312, 553)                  | 1480 (586, 2126)      |
| % (n/N) below the EAR (100 µg/day) | 46% (25/55)                                       | 86% (25/29)                      | 0% (0/26)                       | 0% (0/8)              |
| %(n/N) above the UL (600 µg/day)   | 16% (9/55)                                        | 10% (3/29)                       | 23% (6/26)                      | 80% (6/8)             |

<sup>a</sup> Kruskal Wallis test was used to test difference in total intake between non-supplement users, supplement users and macroalgae users, significant p-values <0.001 are marked as \*\*.

**Table S3.** Iodine intake from foods, supplements and macroalgae by 24-hour and habitual intake in pescatarians (*n*=35).

| Pescatarian                                           | Calculated iodine intake $\mu\text{g}/\text{day}$ (Median (IQR)) |                                     |                                 |                                | P-value <sup>a</sup> |
|-------------------------------------------------------|------------------------------------------------------------------|-------------------------------------|---------------------------------|--------------------------------|----------------------|
|                                                       | All ( <i>n</i> =35)                                              | Non supplement user ( <i>n</i> =17) | Supplement user ( <i>n</i> =18) |                                |                      |
| <b>24-hour intake</b>                                 | All ( <i>n</i> =35)                                              | Non supplement user ( <i>n</i> =17) | Supplement user ( <i>n</i> =18) |                                |                      |
| Food only                                             | 16 (12, 29)                                                      | 16 (8, 32)                          | 19 (13, 28)                     |                                |                      |
| I Supplements only                                    | 150, (150, 206)                                                  | NA                                  | 150, (150, 206)                 |                                |                      |
| Total intake                                          | 123 (16, 176)                                                    | 16 (8, 32)                          | 173 (163, 223)                  |                                | <0.001**             |
| % (n/N) below the EAR (100 $\mu\text{g}/\text{day}$ ) | 46%                                                              | 94%                                 | 0%                              |                                |                      |
| % (n/N) above the UL (600 $\mu\text{g}/\text{day}$ )  | 0% (0/35)                                                        | 0% (0/17)                           | 6% (1/18)                       |                                |                      |
| <b>Habitual intake</b>                                | All ( <i>n</i> =35)                                              | Non supplement user ( <i>n</i> =25) | Supplement user ( <i>n</i> =10) | Macroalgae user ( <i>n</i> =4) |                      |
| Food only                                             | 20 (15, 30)                                                      | 20 (14, 36)                         | 21 (14, 27)                     | 18 (16, 54)                    |                      |
| I Supplements only                                    | 150, (150, 225)                                                  | NA                                  | 150, (150, 225)                 | 150 (186, 225)                 |                      |
| Macro-algae only                                      | 375 (110, 610)                                                   | 570 (491, 650) ( <b>n=2</b> )       | 160 (60, 260) ( <b>n=2</b> )    | 376 (110, 610)                 |                      |
| Total intake                                          | 39 (16, 324)                                                     | 20 (14, 36)                         | 327 (314, 540)                  | 587 (446, 714)                 | 0.001*               |
| % (n/N) below the EAR (100 $\mu\text{g}/\text{day}$ ) | 66% (23/35)                                                      | 92% (23/25)                         | 0% (0/10)                       | 0% (0/4)                       |                      |
| % (n/N) above the UL (600 $\mu\text{g}/\text{day}$ )  | 9% (3/35)                                                        | 4% (1/25)                           | 20% (2/10)                      | 50% (2/4)                      |                      |

<sup>a</sup> Kruskal Wallis test was used to test difference in total intake between non-supplement users, supplement users and macroalgae users, significance level <0.05 was used marked as \* and significant p-values <0.001 as \*\*.
